# Supplementary material for: Membrane expression of thymidine kinase 1 and potential clinical relevance in lung, breast, and colorectal malignancies
Source: Springer Nature journal article supplement (doi:10.1186/s12935-018-0633-9), 2018-09-10

**HT-29**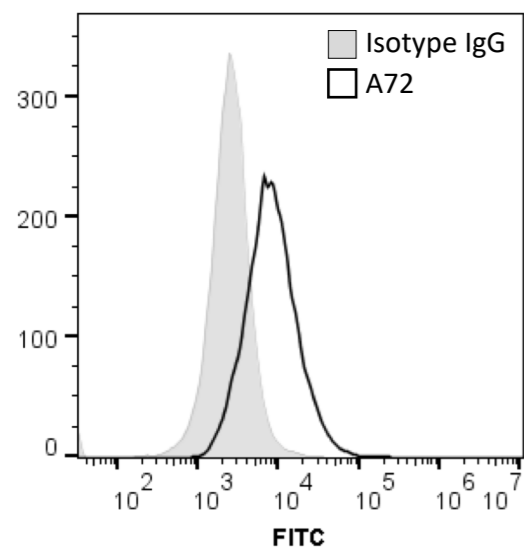**SW620**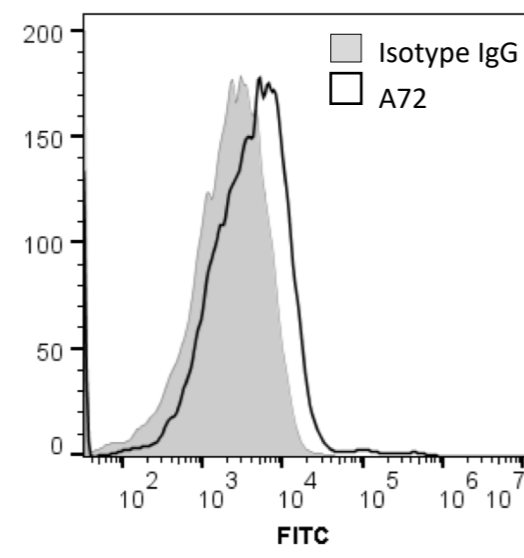**MCF7**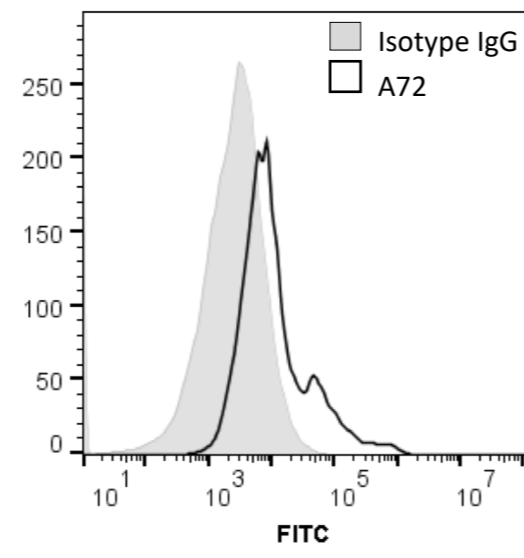**MDA-MB-231**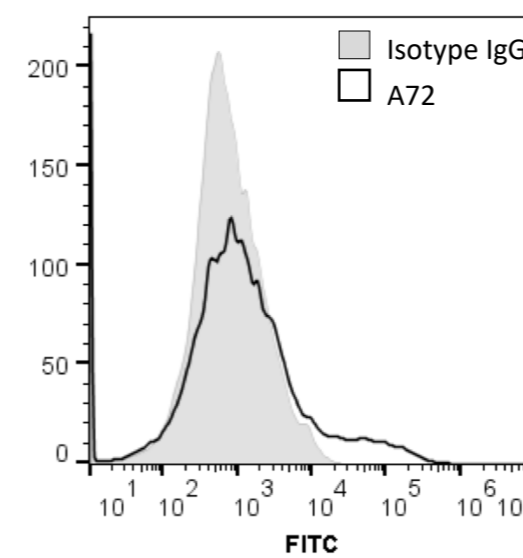**A549**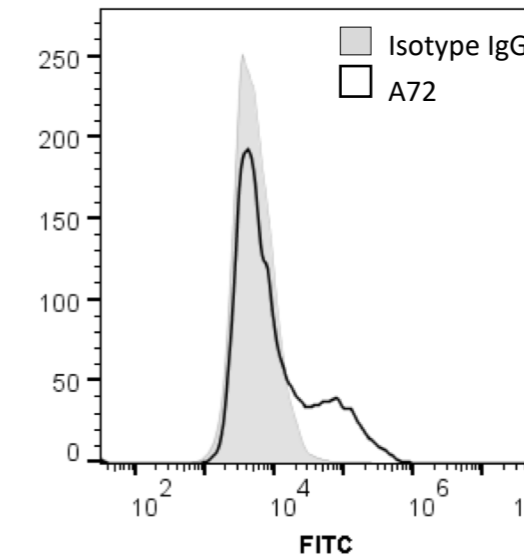**NCI-H460**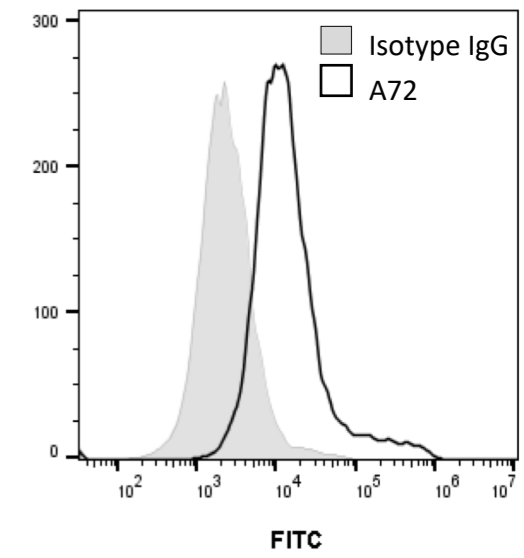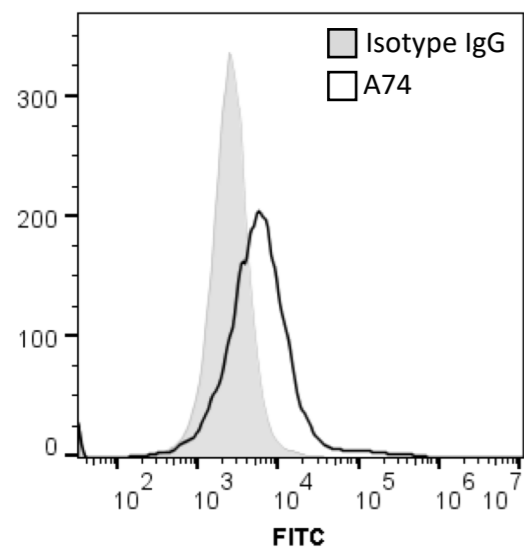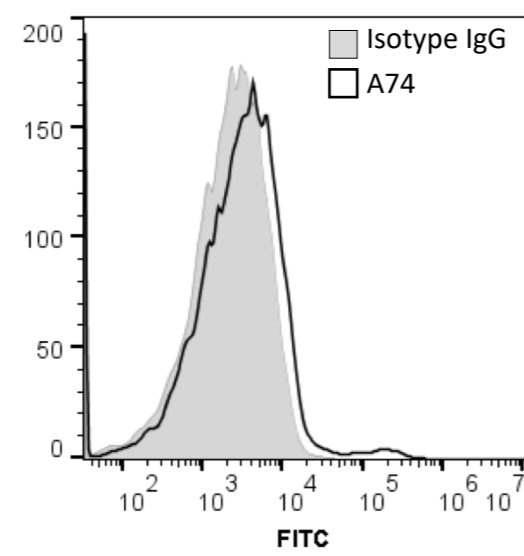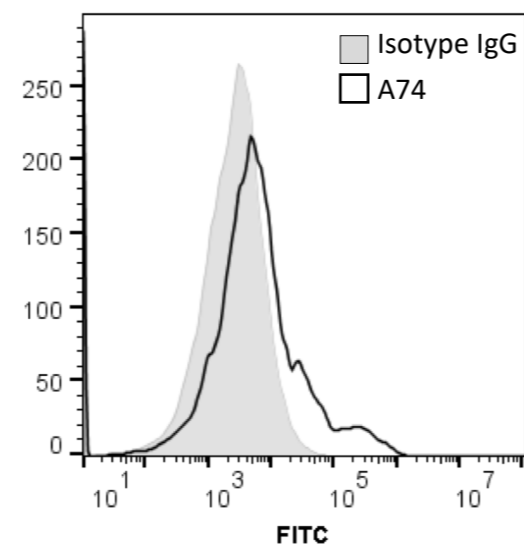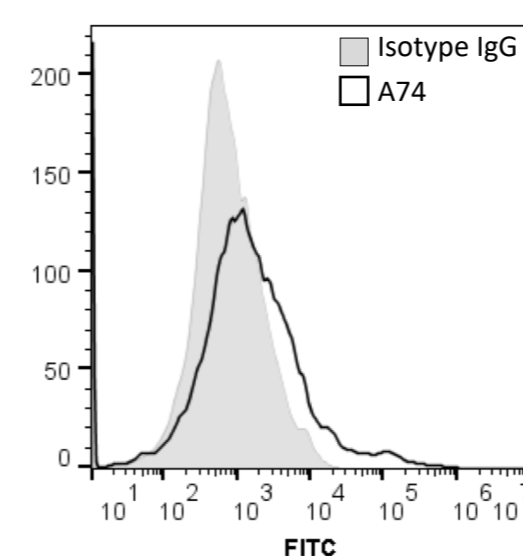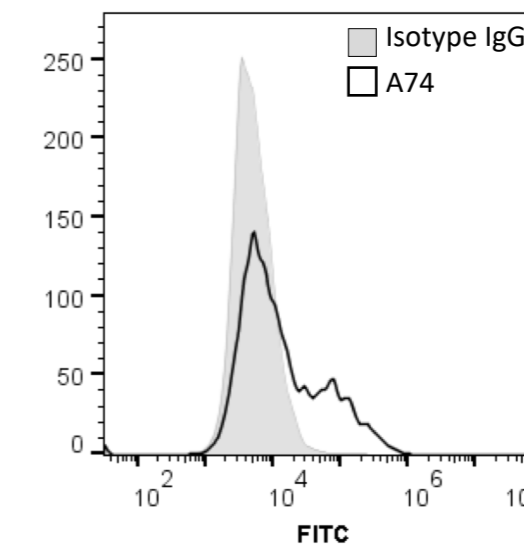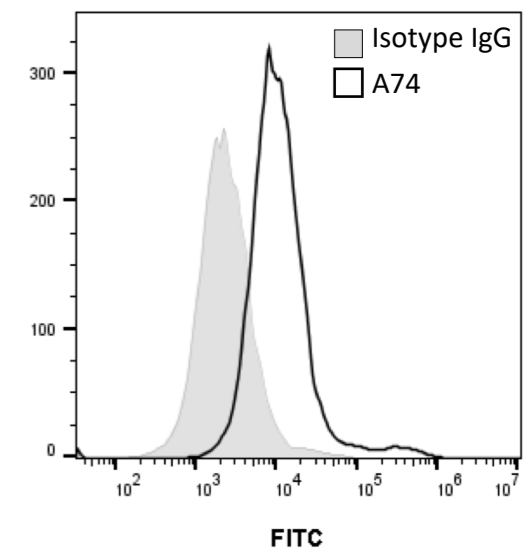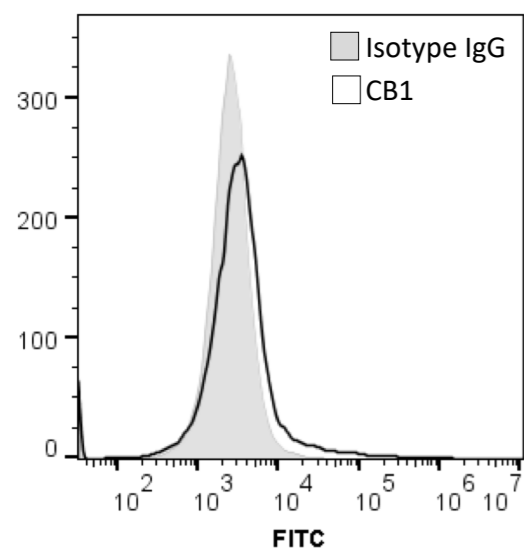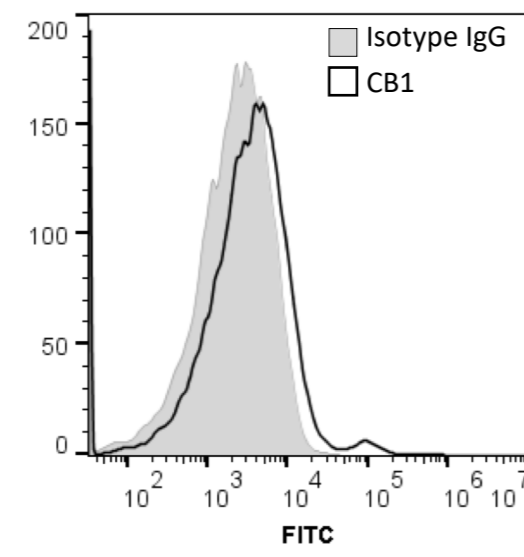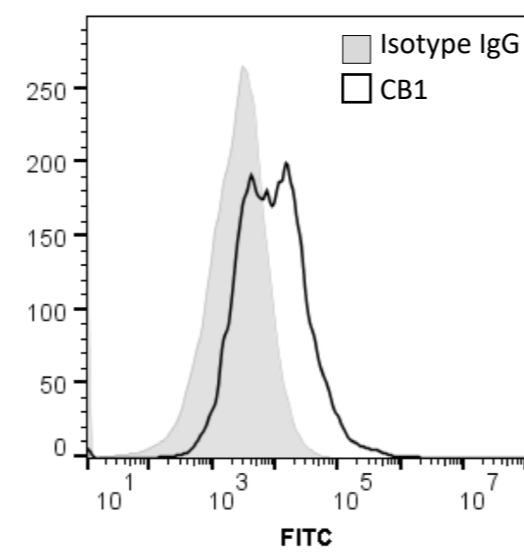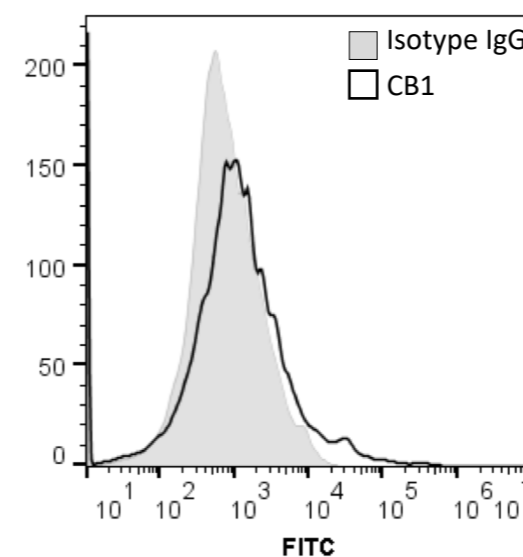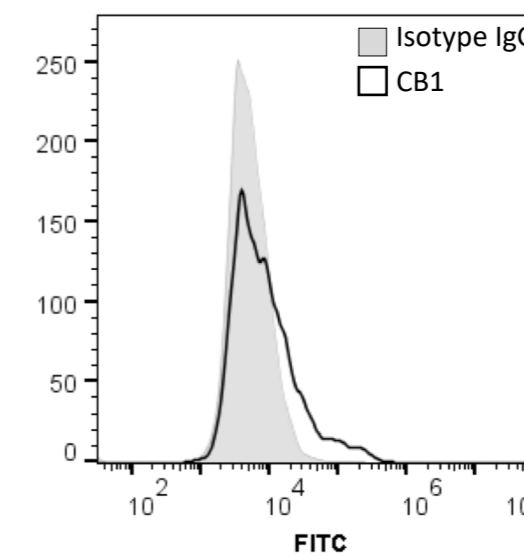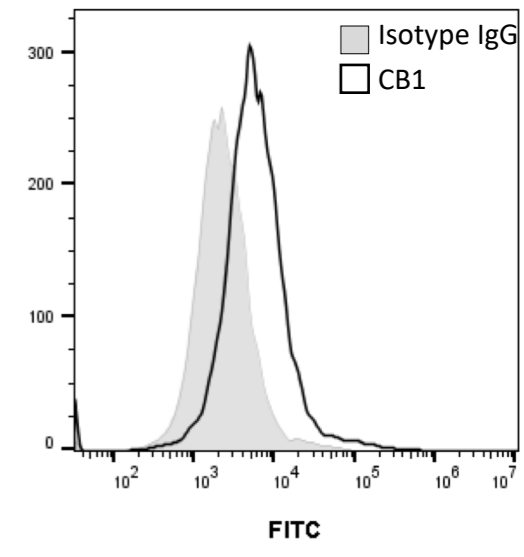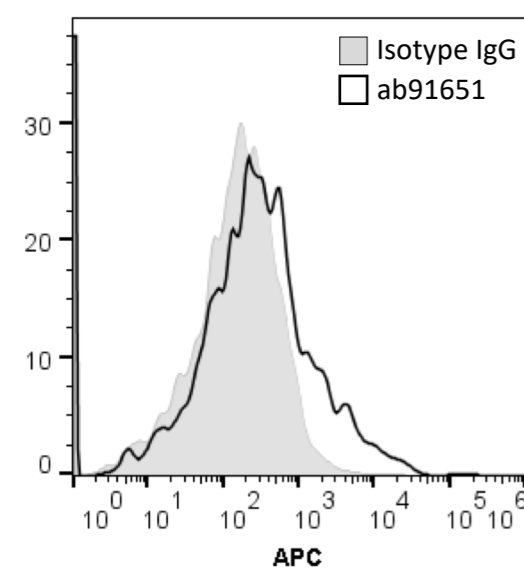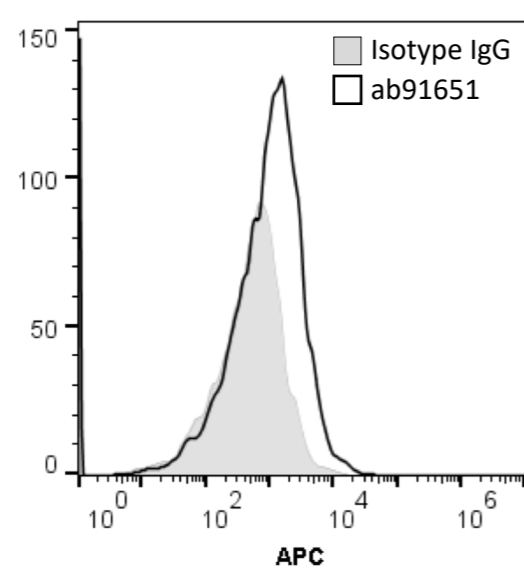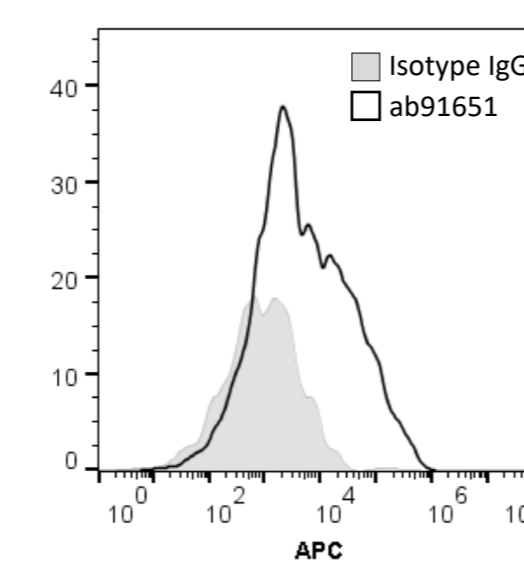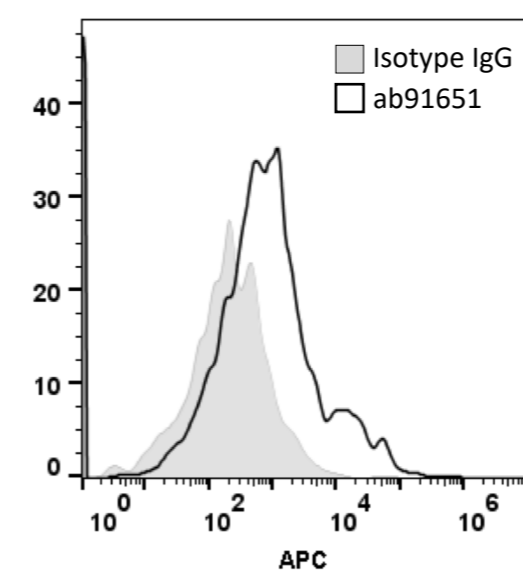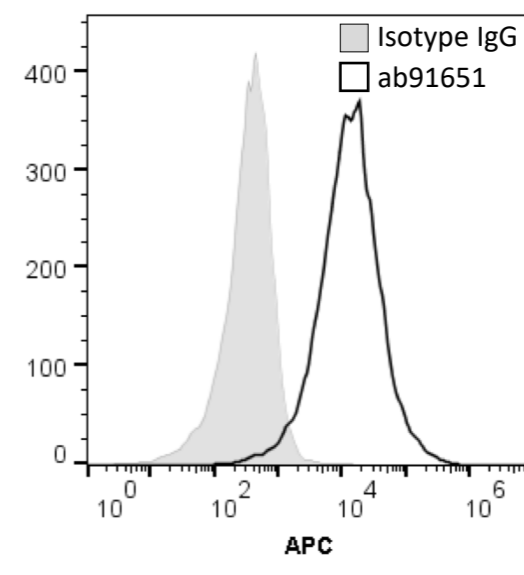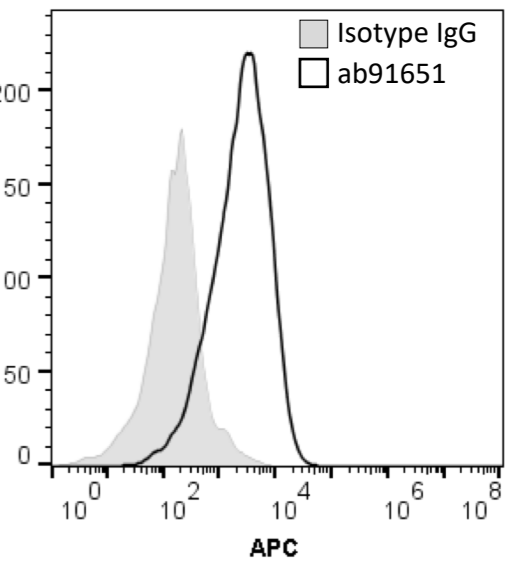

Supplement: MOESM1 [file 16111148]
